# Supplementary material
Source: PubMed Central journal article supplement (PMC9668990)
Supplement: 41467_2022_34506_MOESM1_ESM.pdf [file 41467_2022_34506_MOESM1_ESM.pdf]

## SUPPLEMENTARY FIGURES AND CAPTIONS

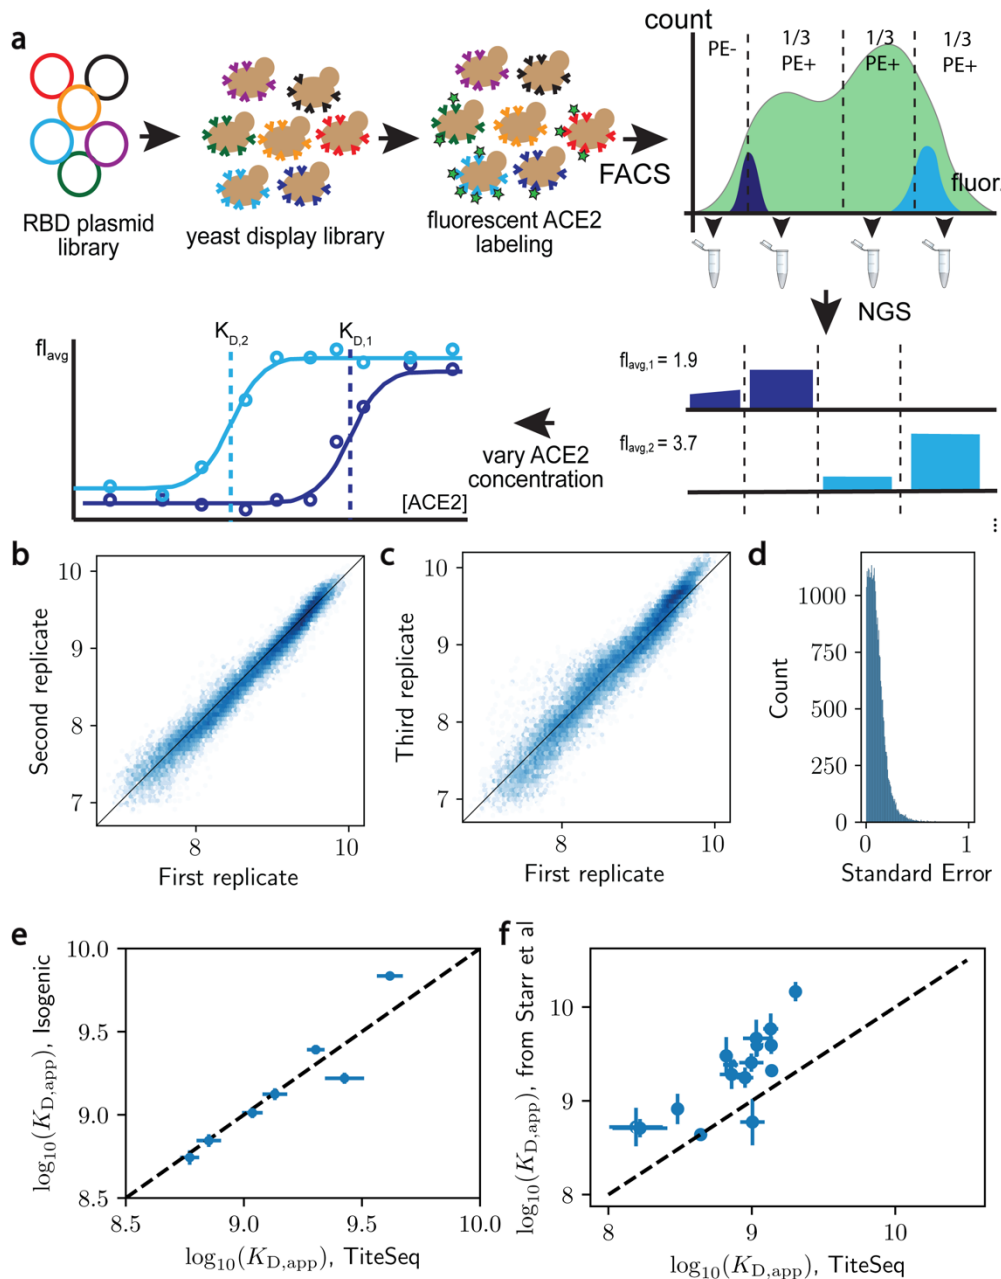

1 **Supplementary Figure 1: Schematic overview of the experimental method and reproducibility of**  
 2 **dissociation constants determined via Tite-seq. (a)** The plasmid library of RBD variants is first  
 3 transformed into a standard yeast display strain. The library is incubated with soluble, fluorescent ACE2  
 4 and sorted by flow cytometry into bins based on ACE2 fluorescence. Deep sequencing of each bin yields  
 5 an estimate for the mean bin ( $B_{avg}$ ) of each RBD variant. This is repeated for varying ACE2 concentration  
 6 to produce a titration curve. Since the fluorescence is linearly related to the RBD occupancy on the yeast  
 7 cell surface, apparent equilibrium dissociation constants can be inferred by fitting  $B_{avg}$  to the ACE2  
 8 concentration. **(b)** Correlation of  $-\log(K_{D,app})$  between the first and second biological replicates. **(c)**  
 9 Correlation of  $-\log(K_{D,app})$  between the first and third biological replicates. **(d)** Distribution of the standard  
 10 error of  $-\log(K_{D,app})$  between biological replicates. **(e)** Isogenic measurements (see Methods) versus Tite-  
 11 Seq measurement with a 1:1 dotted line. **(f)** Comparison of Tite-Seq  $K_D$  measurements with independent  
 12  $K_D$  measurements reported in Starr et al<sup>9</sup> with a 1:1 dotted line. Standard errors among replicates are  
 13 shown by the mean-centered bars (**e,f**;  $n=2$  vertically,  $n=3$  horizontally).

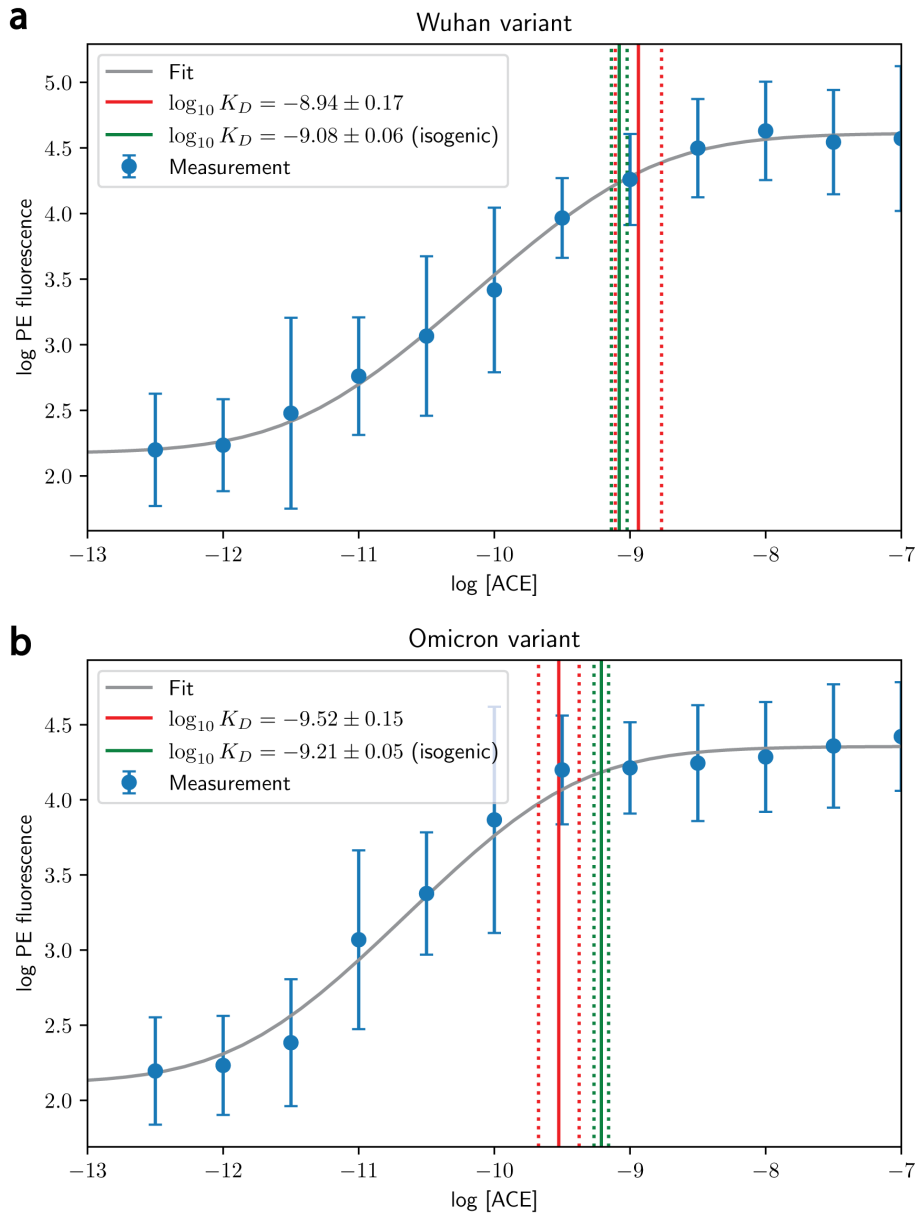

14 **Supplementary Figure 2: Binding affinity curves of Wuhan Hu-1 and Omicron BA.1 variants.** (a,b)  
 15 Inferred mean log-transformed fluorescence values at each concentration (blue) for the Wuhan Hu-1  
 16 variant (a) and the Omicron BA.1 variant (b) shown across log-transformed ACE2 concentrations. The  
 17 blue line represents the inferred standard deviation (centered to the mean), whereas the gray line across  
 18 the concentrations is the fit of the binding curve. Inferred  $K_{D,app}$  values from Tite-Seq experiment and  
 19 isogenic experiment are shown by the red and green lines, respectively, and the corresponding dashed  
 20 lines represent inferred errors on these values.

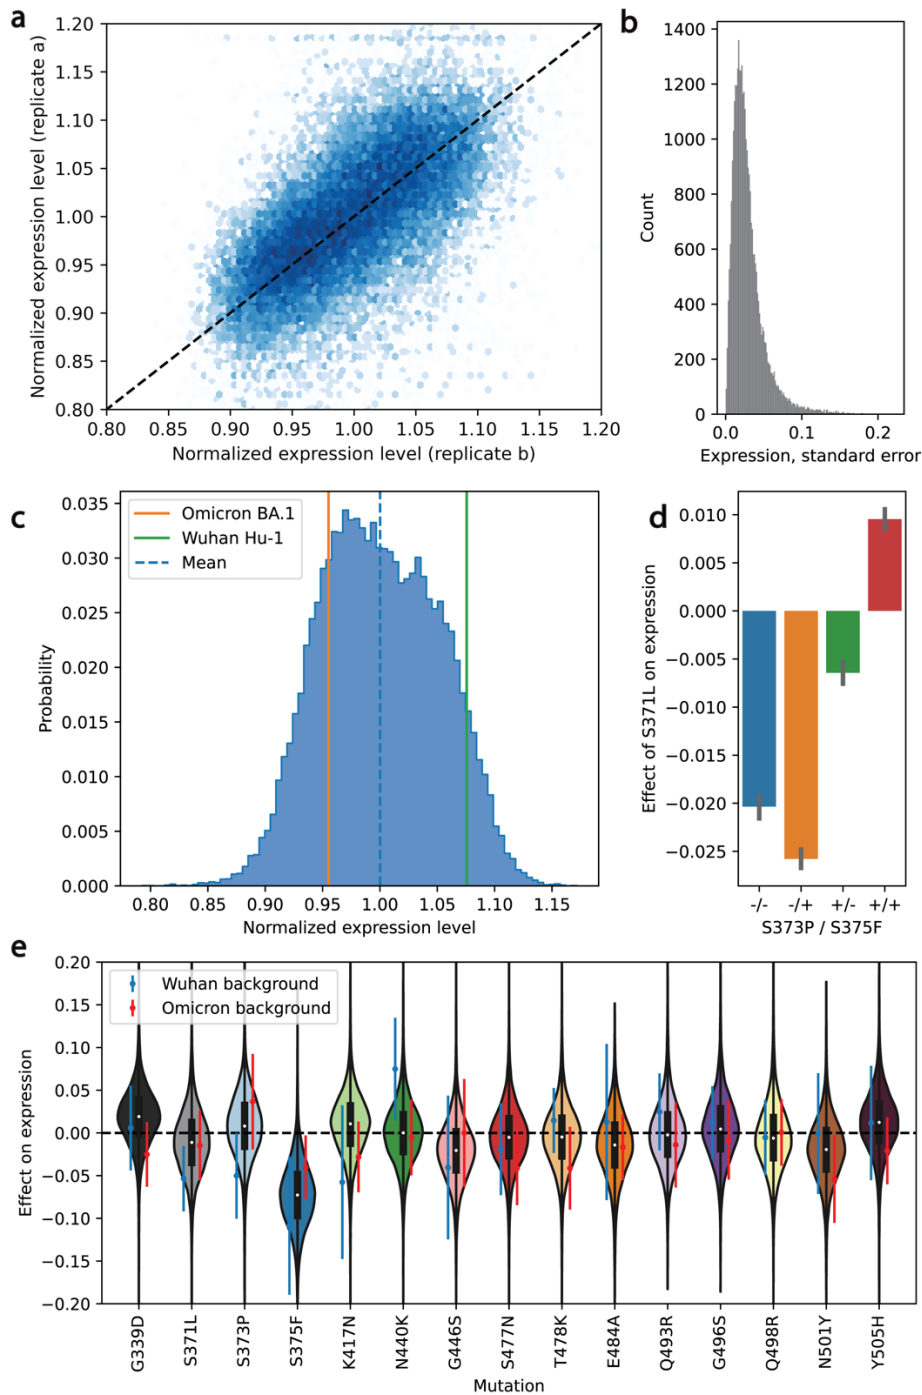

21  
 22 **Supplementary Figure 3: Expression level of RBD in the yeast display system.** (a) Correlation of  
 23 normalized expression levels between the first and second biological replicates. (b) Distribution of the  
 24 normalized expression levels between biological replicates. (c) Distribution of the normalized yeast-  
 25 display expression of each RBD variant in the library. Vertical red and green lines represent the  
 26 expression for Wuhan Hu-1 and Omicron BA.1, respectively. (d) Effect of the S371L mutation on  
 27 expression levels depending on the S373P and S375F background. The error bar shows the standard  
 28 error (n=4096) (e) Mutational effects (defined as the difference in normalized expression after adding one  
 29 mutation) for each Omicron BA.1 RBD mutation. Violin plots show full distribution of effects, where black  
 30 box indicate 25th and 75th percentiles and the black point denotes mean (n=16384). Blue and red points  
 31 specify effects on Wuhan Hu-1 and into Omicron BA.1 variants, respectively. Error bars on these  
 32 individual backgrounds represent the standard deviation (n=3)

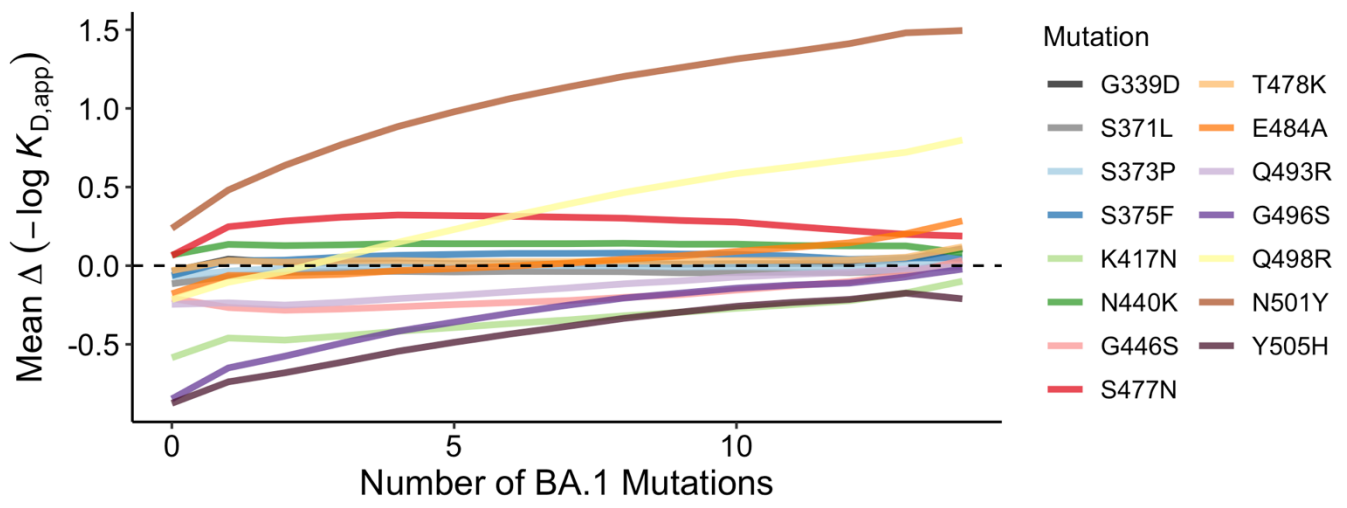

33 **Supplementary Figure 4: Change in ACE2 affinity across number of mutations.** The mean effect of  
 34 each mutation is plotted against the number of BA.1 mutations in the genotypic background. Dashed line  
 35 indicates no change in affinity.

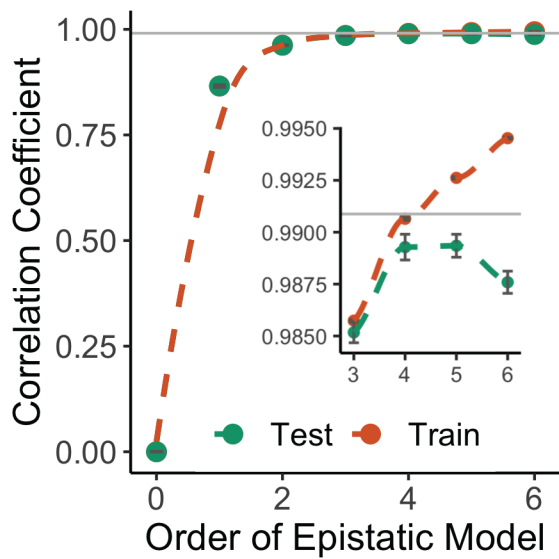

36 **Supplementary Figure 5: Truncation of biochemical epistasis model.** Correlation coefficients  
 37 between the measured values of  $-\log(K_{D,app})$  and the model estimate for various orders of epistatic  
 38 model. Correlations are computed on the subset of the dataset on which the model was trained (orange)  
 39 and on the hold-out subset (green), averaged over the 10 folds of cross-validation. The inset is a  
 40 zoomed-in version for orders 3 to 6. Error bars represent the standard error ( $n=10$ ).

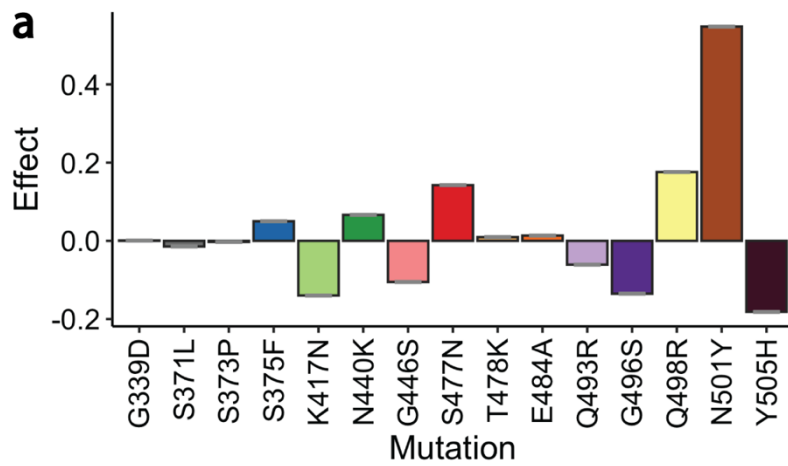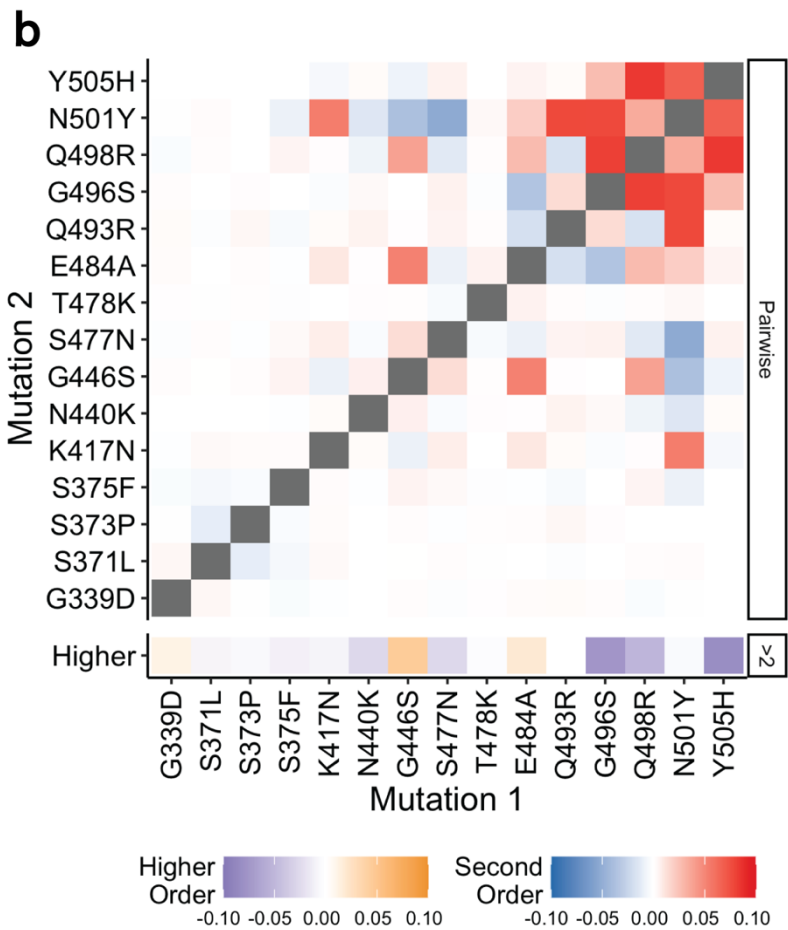

41 **Supplementary Figure 6: Alternative model of statistical epistasis. (a)** Linear effect of each mutation  
 42 in the statistical epistasis model that is truncated at the fourth order. **(b)** Second-order epistatic  
 43 interaction coefficients and higher order interaction in the statistical epistasis model.

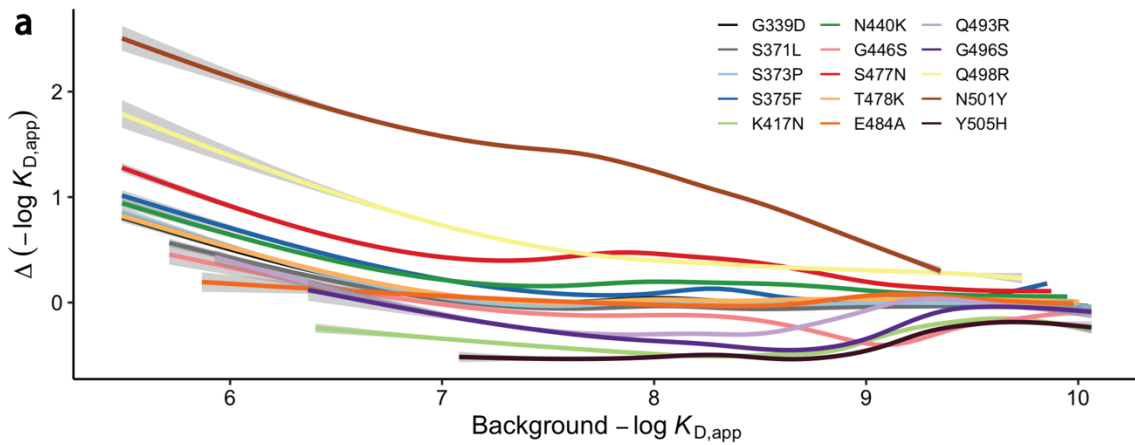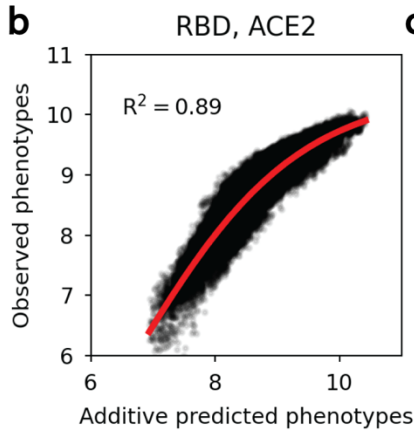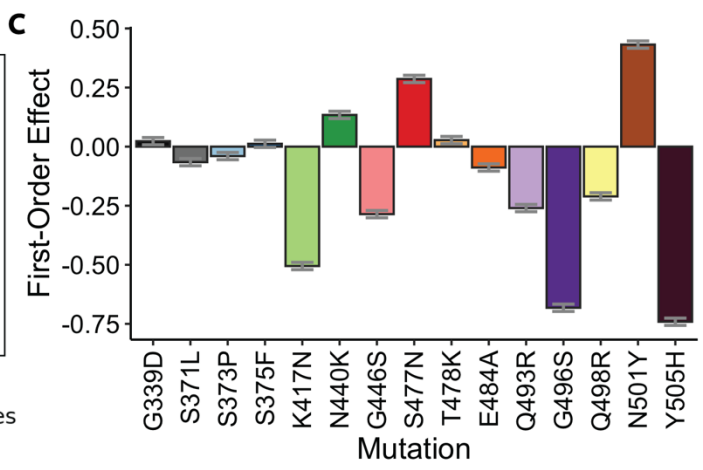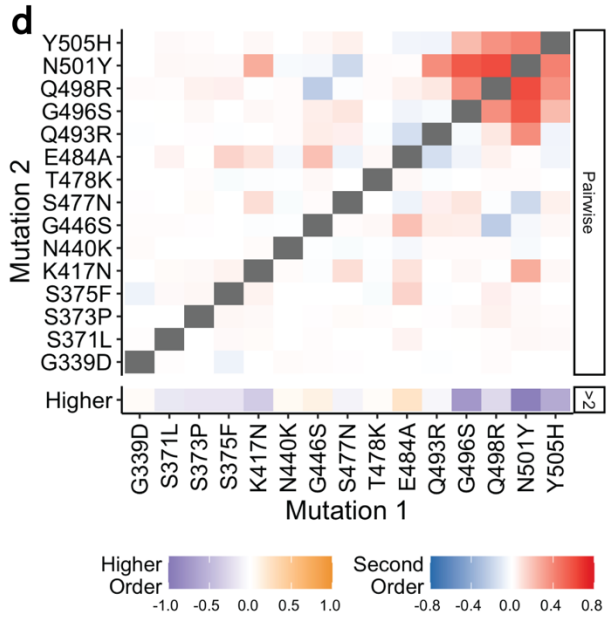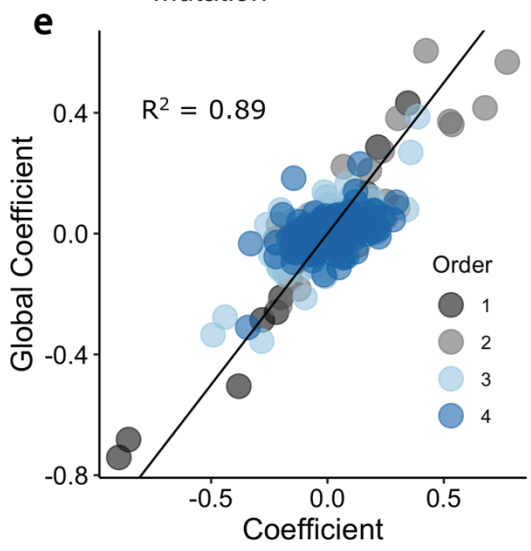

44 **Supplementary Figure 7: Global epistasis** (a) Relationship between the binding affinity and the mean  
 45 effect of an additional mutation on this background. (b) Relationship between the observed binding  
 46 affinity and the affinity predicted with a linear additive model without epistasis. The red line represents  
 47 the global epistasis function. (c) Linear effect of each mutation in the global epistasis model that is  
 48 truncated at the fourth order. Error bars represent the standard error (n=10). (d) Second-order and  
 49 higher-order epistatic interaction coefficients in the global epistatic model. (e) Correlation between the  
 50 epistatic interaction coefficients of the models with and without global epistasis. The black line represents  
 51 the best fit.

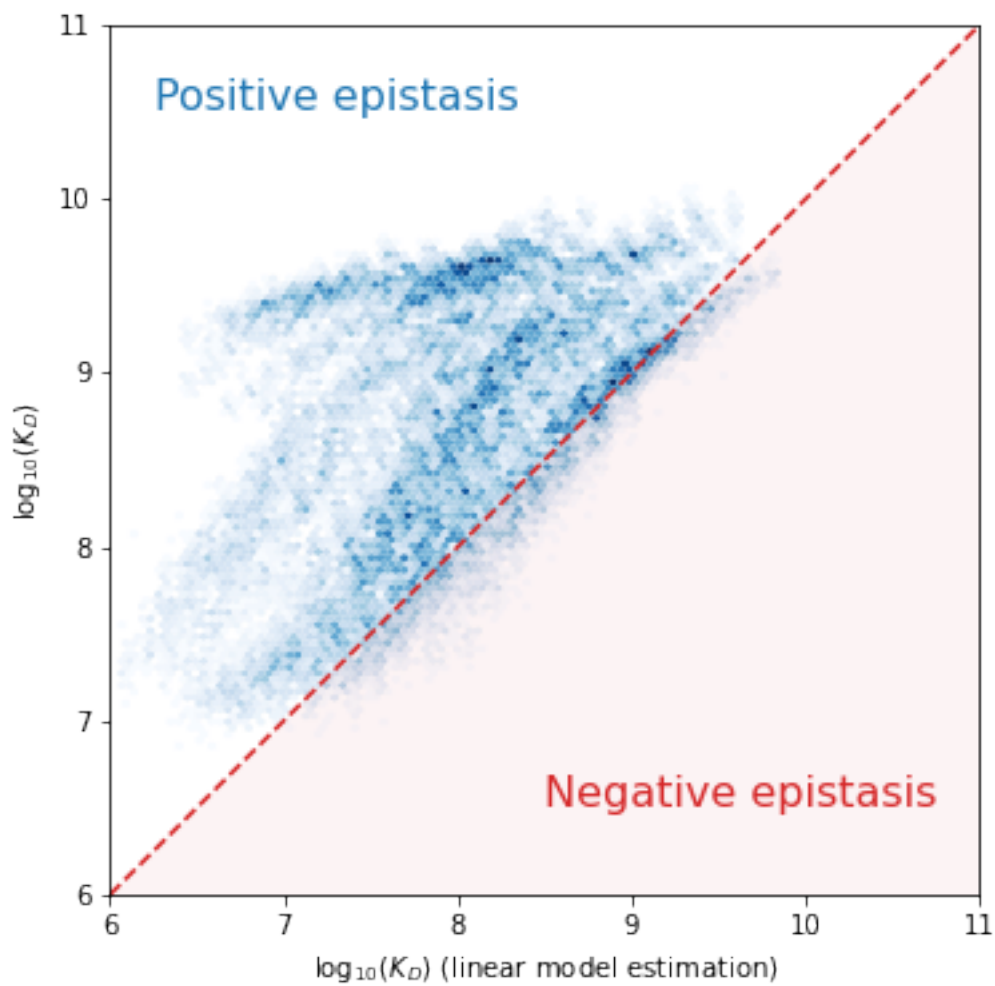

52 **Supplementary Figure 8: Comparison between the linear model estimate of the binding affinity**  
53 **and the measured binding affinity.** The x-axis is the predicted binding affinity, using only the linear  
54 coefficients of the full 5th-order model; the y-axis is the measured binding affinity.



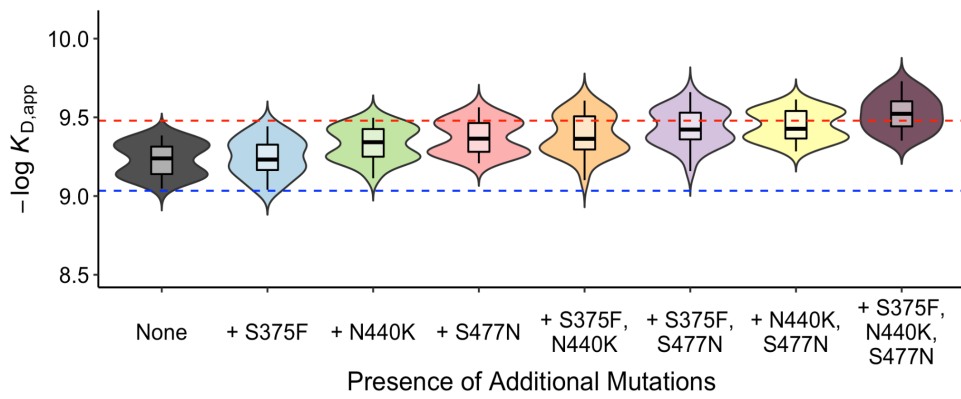

55 **Supplementary Figure 9: Binding affinity of escape genotypes with additional compensatory**  
 56 **mutations.** The ACE2 binding affinities of variants with all seven mutations discussed in the main text  
 57 (the five escape mutations K417N, G446S, E484A, Q493R, and G496S, plus Q498R and N501Y) with all  
 58 possible combinations of three other mutations (S375F, N440K, and S477N). Blue and red dashed lines  
 59 represent Wuhan Hu-1 and Omicron BA.1 affinity, respectively. Box bounds represent the 25<sup>th</sup> and 75<sup>th</sup>  
 60 percentiles respectively.

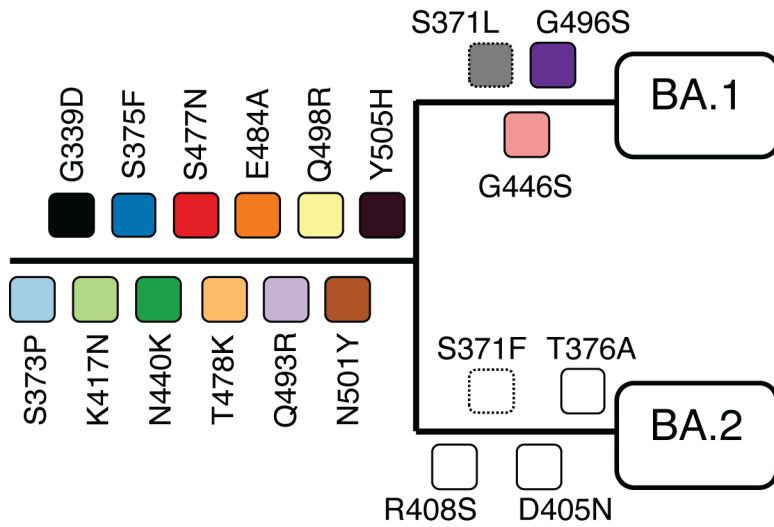

61 **Supplementary Figure 10: Phylogeny of BA.1 and BA.2 showing mutations in spike protein RBD.**  
 62 Mutations are colored as in Figure 2A. Dashed boxes indicate mutations with ambiguous positions on the  
 63 tree.

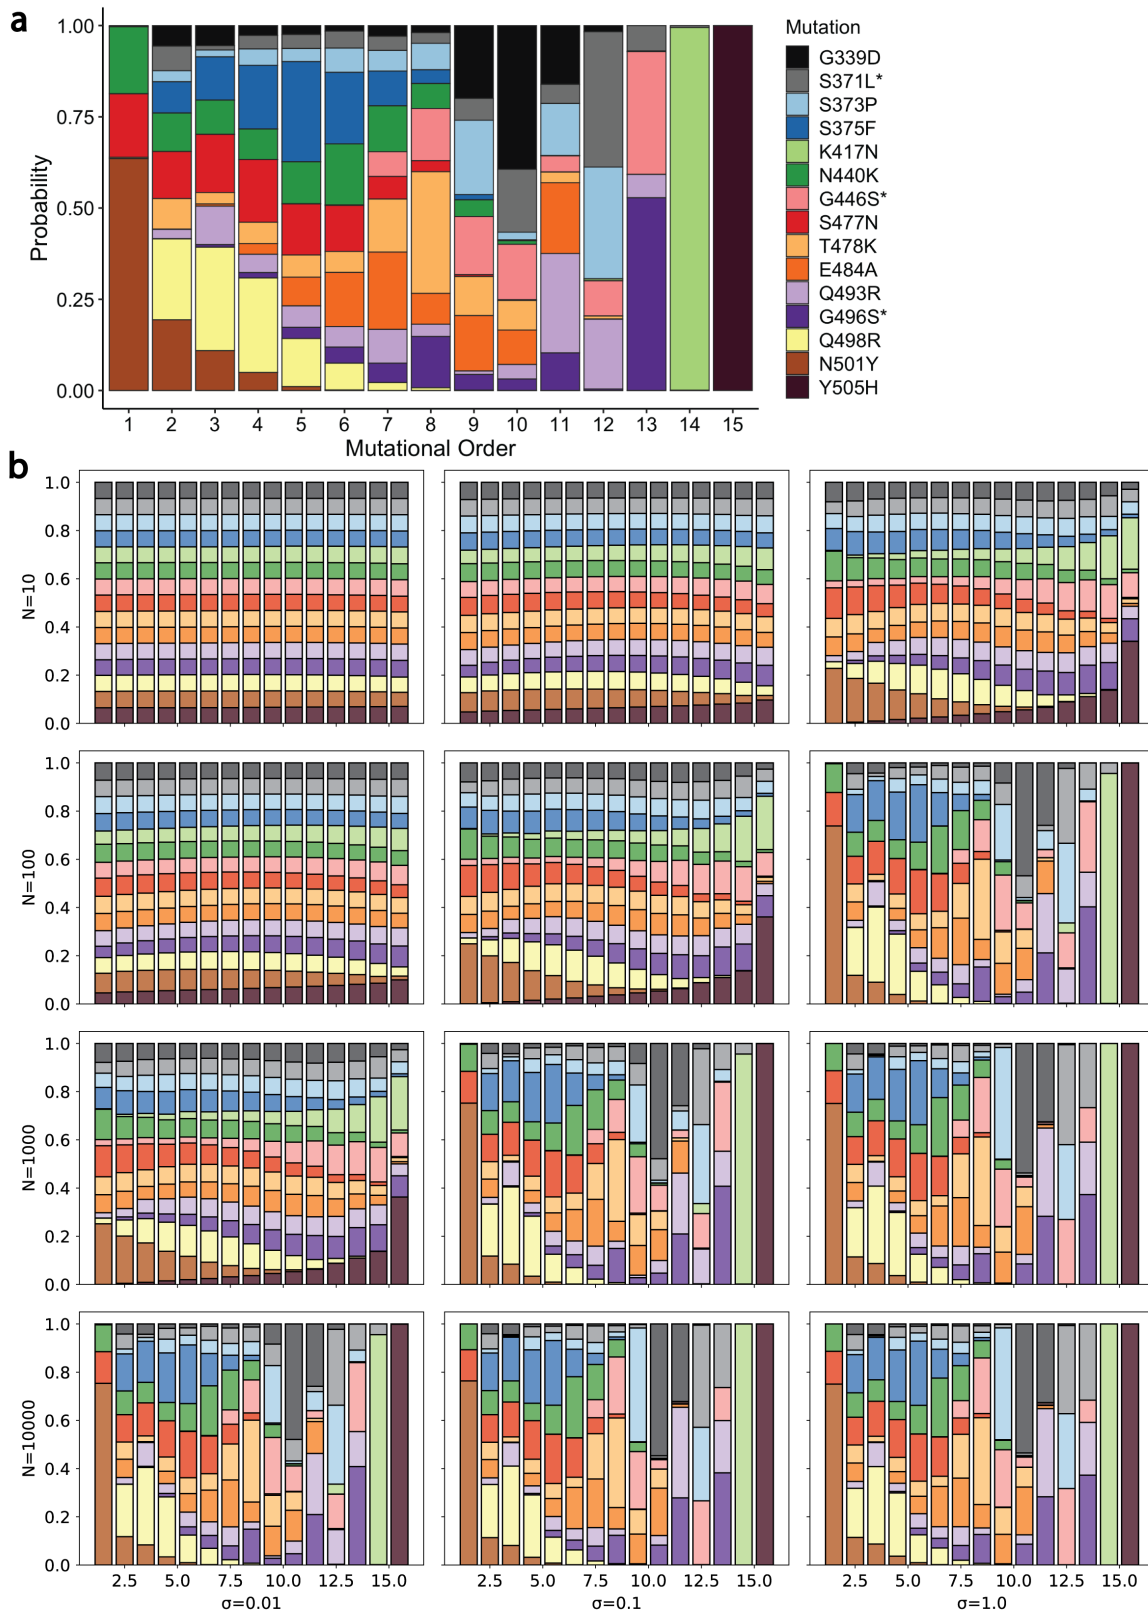

64 **Supplementary Figure 11: Inferred order of mutations.**

65 (a,b) Conditional probability of mutation order with  $N=100$  and  $\sigma = 1$  (a) and varying  $N$  and  $\sigma$  (b)  
 66 from Wuhan-Hu-1 to Omicron BA.1 variant, assuming a classical population dynamics model (see  
 67 Methods). Mutations with asterisks are known to happen last (see Supplementary Figure 10).
